# Supplementary material for: Hybrid theranostic microbubbles for ultrasound/photoacoustic imaging guided starvation/low-temperature photothermal/hypoxia-activated synergistic cancer therapy
Source: Royal Society of Chemistry journal article supplement (doi:10.1039/d1tb01735g), 2021-01-01
Supplement: d1tb01735g1.pdf [file d1tb01735g1.pdf]

## Supporting Information

### **Hybrid Theranostic Microbubbles for Ultrasound/Photoacoustic Imaging Guided Starvation/Low-Temperature Photothermal/Hypoxia-Activated Synergistic Cancer Therapy**

Feng Tian,<sup>a</sup> Xingjian Zhong,<sup>a</sup> JunKai Zhao,<sup>b</sup> Yutian Gu,<sup>a</sup> Yadi Fan,<sup>a</sup> Fan Shi,<sup>a</sup> Yu Zhang,<sup>c</sup>

Youhua Tan,<sup>a</sup> Wen Chen,<sup>d</sup> Changqing Yi,<sup>b,\*</sup> and Mo Yang<sup>a,\*</sup>

*<sup>a</sup> Department of Biomedical Engineering, The Hong Kong Polytechnic University, Hong Kong  
S. A. R., China*

*<sup>b</sup> Key Laboratory of Sensing Technology and Biomedical Instruments (Guangdong Province),  
School of Biomedical Engineering, Sun Yat-Sen University, Guangzhou, 510006, P. R. China.*

*<sup>c</sup> Department of Mechanical and Automotive Engineering, Royal Melbourne Institute of  
Technology University, Melbourne, Victoria 3000, Australia*

*<sup>d</sup> Department of Electronic and Information Engineering, The Hong Kong Polytechnic  
University, Hong Kong S. A. R., China*

\* Corresponding Authors:

Dr. Changqing Yi, E-mail: [yichq@mail.sysu.edu.cn](mailto:yichq@mail.sysu.edu.cn)

Prof. Mo Yang, E-mail: [mo.yang@polyu.edu.hk](mailto:mo.yang@polyu.edu.hk)

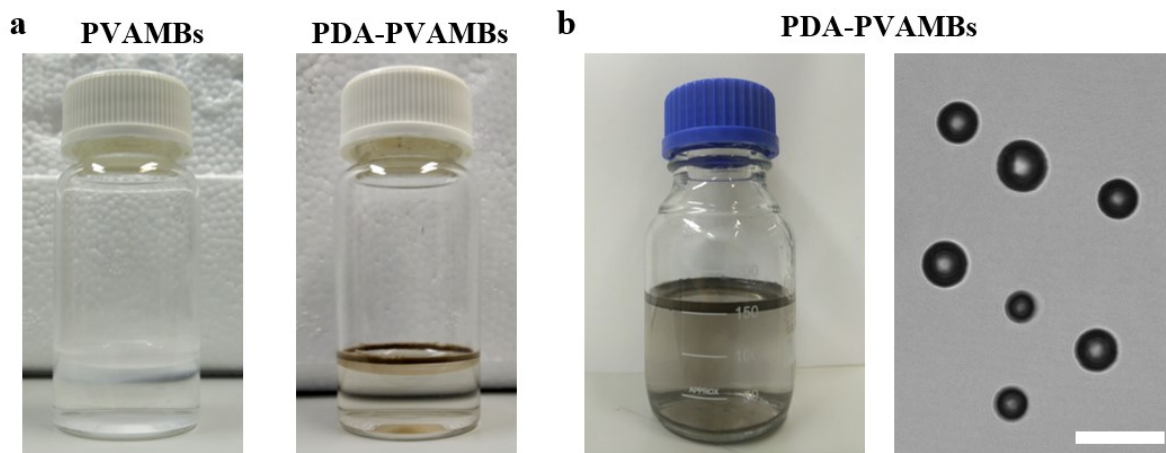

**Fig. S1.** (a) Photographs of PVAMBs and PDA-PVAMBs in solution. (b) Photographs and microscopy image of PDA-PVAMBs after stored for 1 month at room temperature. Scale bar: 10  $\mu\text{m}$ .

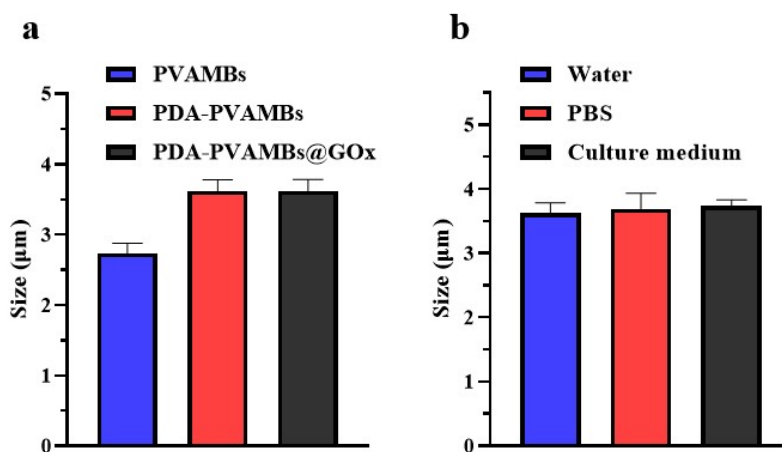

**Fig. S2.** (a) DLS-based size distribution of PVAMBs, PDA-PVAMBs, and PDA-PVAMBs@GOx. (b) PVA-PDAMBs@GOx stability after dispersed in water, PBS, and culture medium for 1 day.

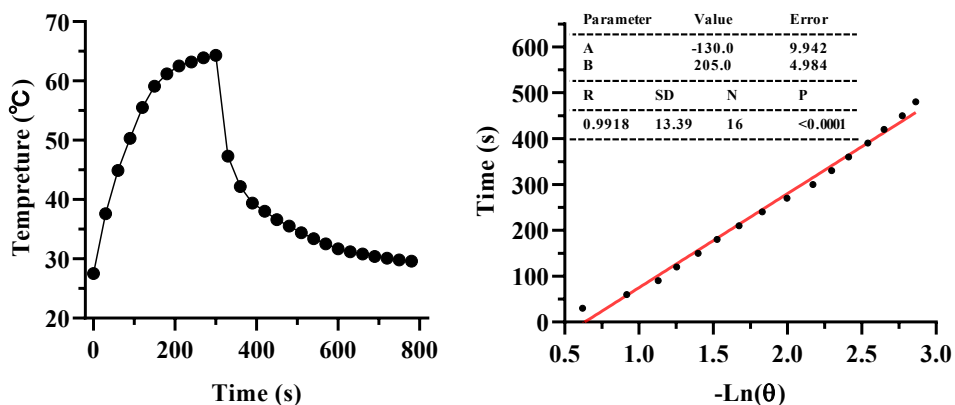

**Fig. S3.** (a) The photothermal cycle of the PDA-PVAMBs aqueous solution ( $0.5 \times 10^8$  counts/mL) for 300 s laser irradiation (808 nm,  $1 \text{ W/cm}^2$ ) and 480 s cooling down. (b) Photothermal conversion efficiency calculation based on linear time versus  $-\ln\theta$  from the photothermal cycle of Figure S2a.

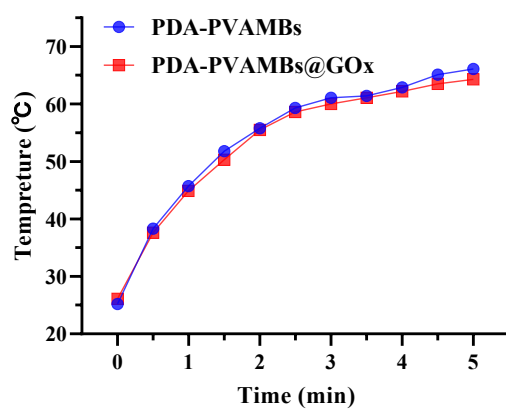

**Fig. S4.** Temperature change of  $0.5 \times 10^8$  counts/mL PDA-PVAMBs and PDA-PVAMBs@GOx under 808 nm laser irradiation ( $1 \text{ W/cm}^2$ ) for 5 min.

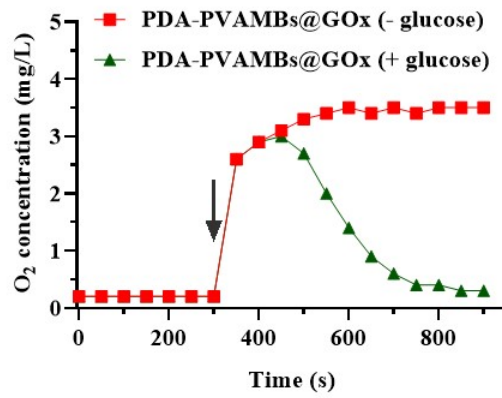

**Fig. S5.** O<sub>2</sub> concentration after adding PDA-PVAMBs@GOx solution to hypoxia-treated solution (with/without 1 mg/mL glucose).

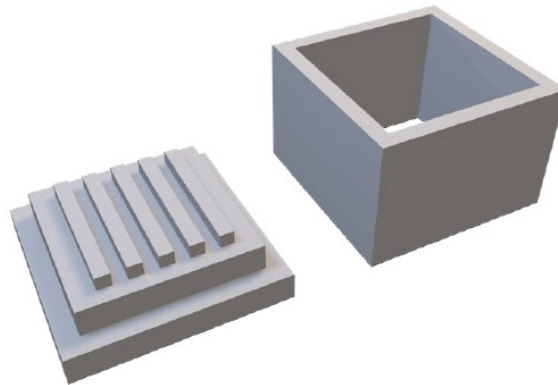

**Fig. S6.** 3D-printed pattern for agarose phantom fabrication for in vitro US and PA imaging.

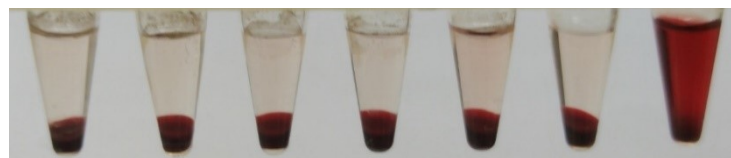

**Fig. S7.** Photograph of samples for haemocompatibility testing. Samples from left to right were: 1, 0.8, 0.6, 0.4,  $0.2 \times 10^7$  counts/mL of PDA-PVAMBs@GOx, PBS, water.

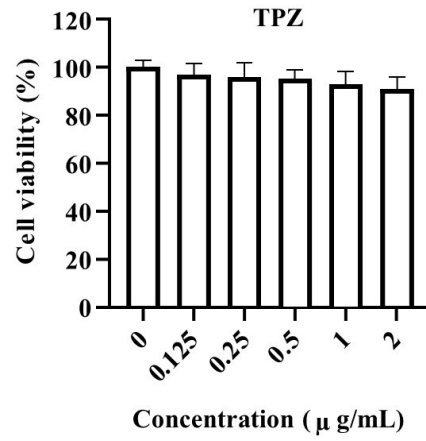

**Fig. S8.** Cell viability tests of CT26 cells treated with various concentration of TPZ.

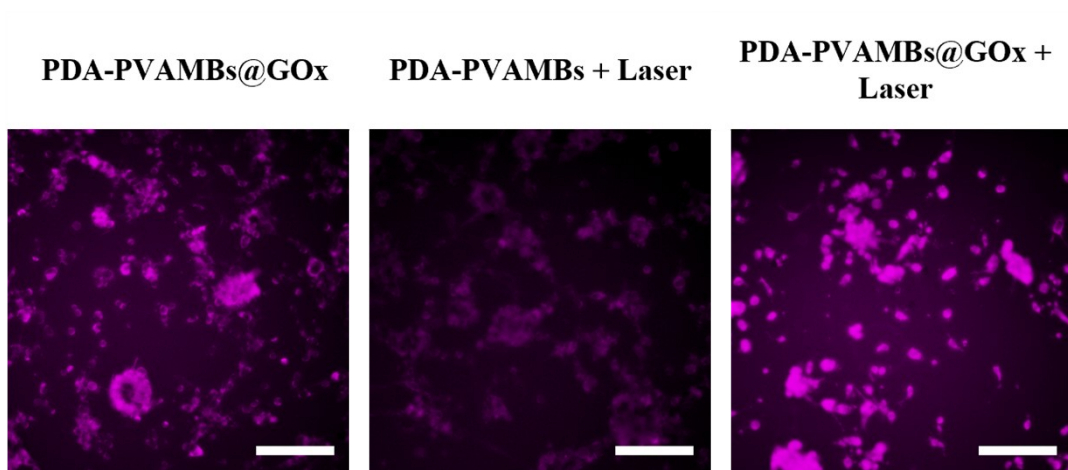

**Fig. S9.** ROS staining of CT26 cells treated with PDA-PVAMBs@GOx, PDA-PVAMBs + Laser, and PDA-PVAMBs@GOx + Laser.

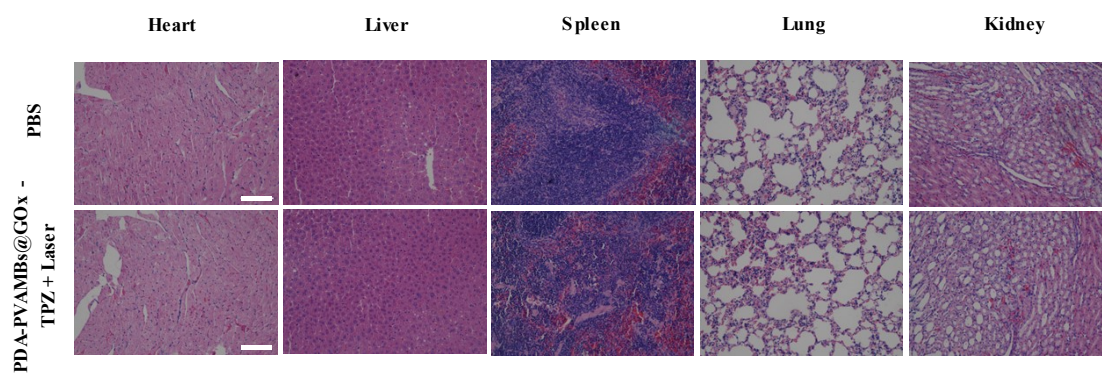

**Fig. S10** Representative H&E staining images of heart, liver, spleen, kidney, and lung after PBS and PDA-PVAMBs@GOx-TPZ + Laser treatment at day 14. Scale bars: 100  $\mu$ m.
